# Supplementary material
Source: MDPI journal article supplement (https://www.mdpi.com/2075-4701/12/10/1709)
Supplement: s1 [file s1]

---

## Using an ANN Approach to Predict Machining Time

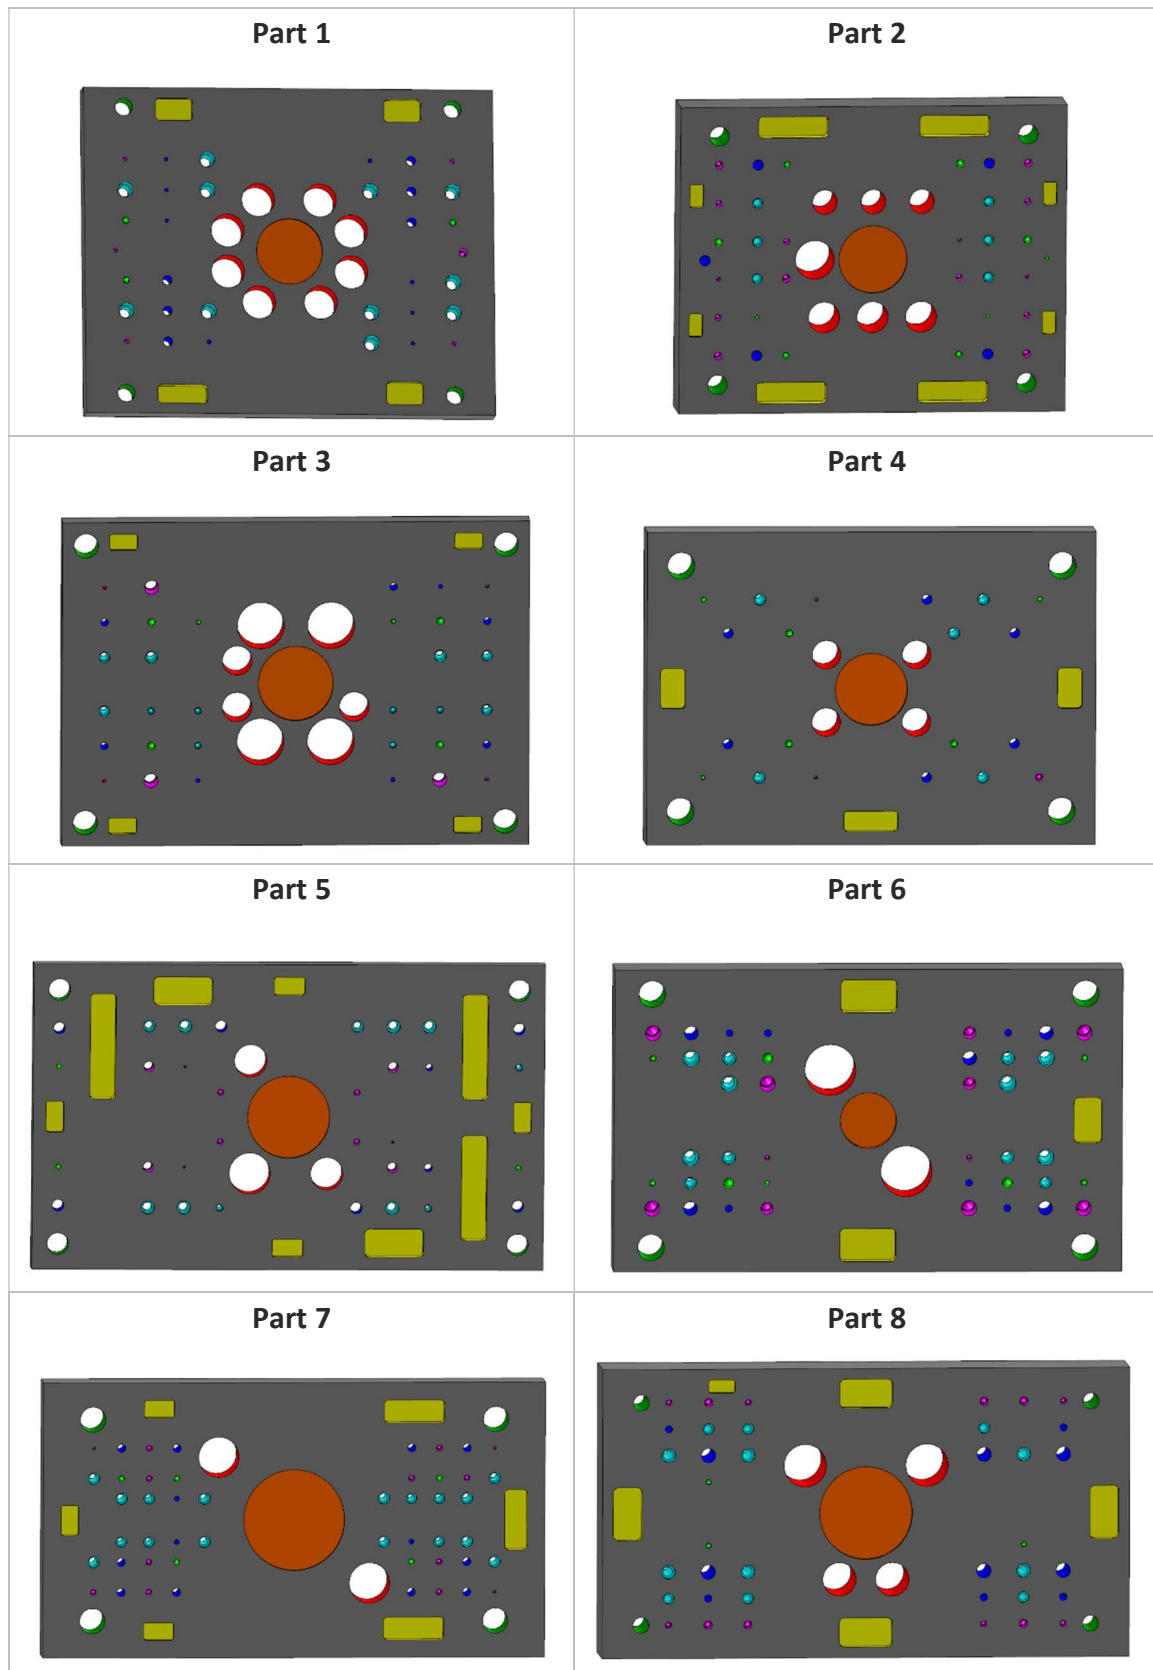

Part 9

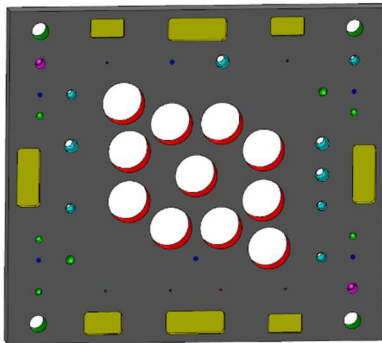

Part 10

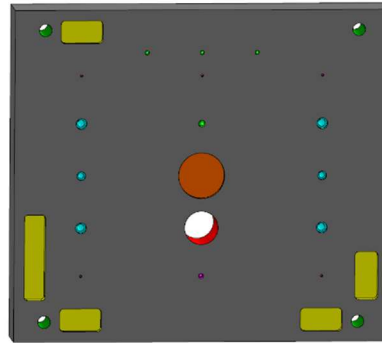

Part 11

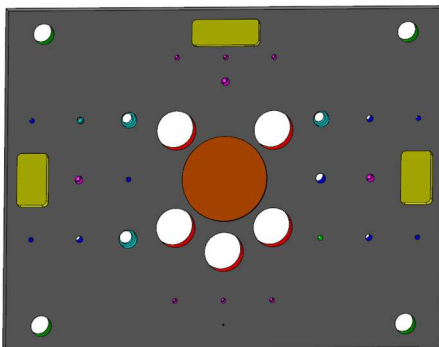

Part 12

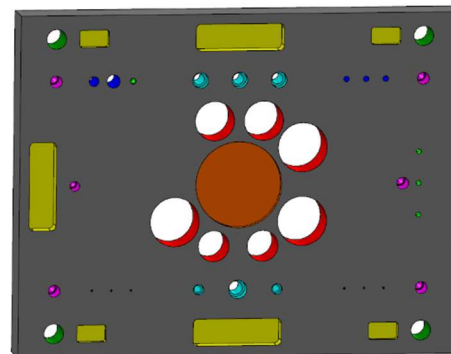

Part 13

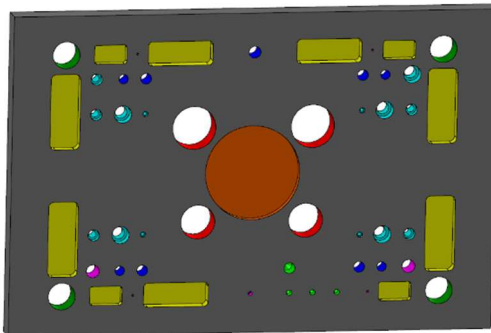

Part 14

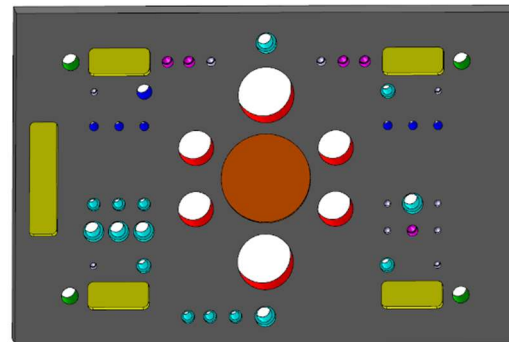

Part 15

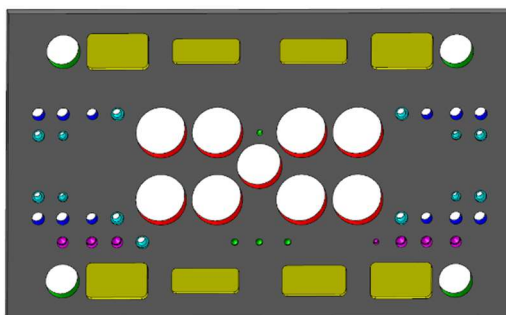

Part 16

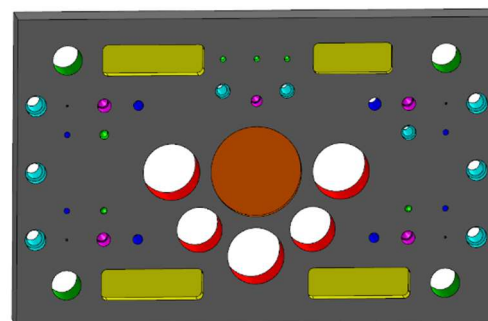

Part 17

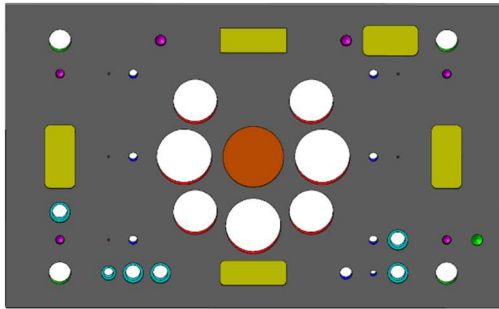

Part 18

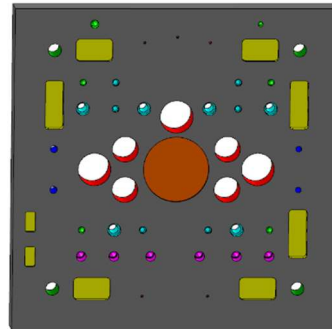

Part 19

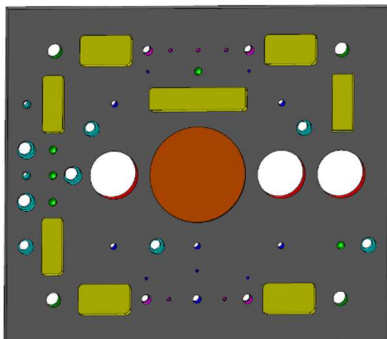

Part 20

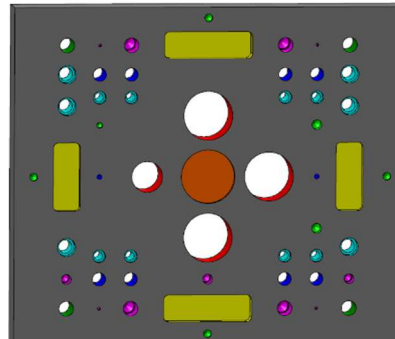

Part 21

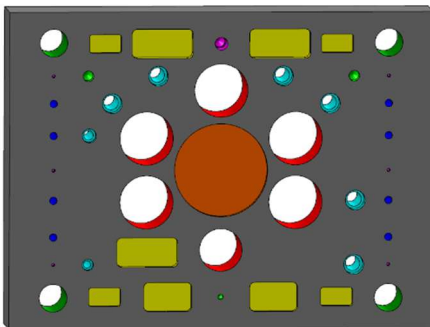

Part 22

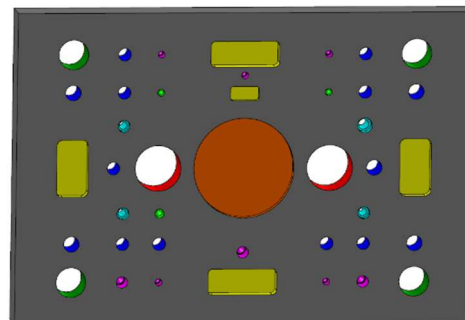

Part 23

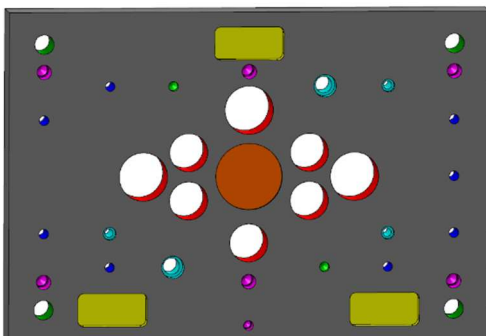

Part 24

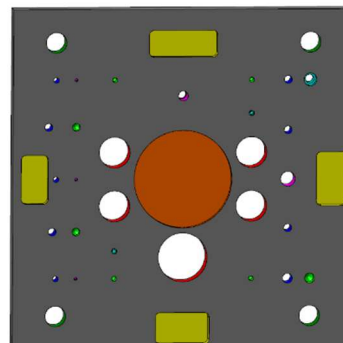

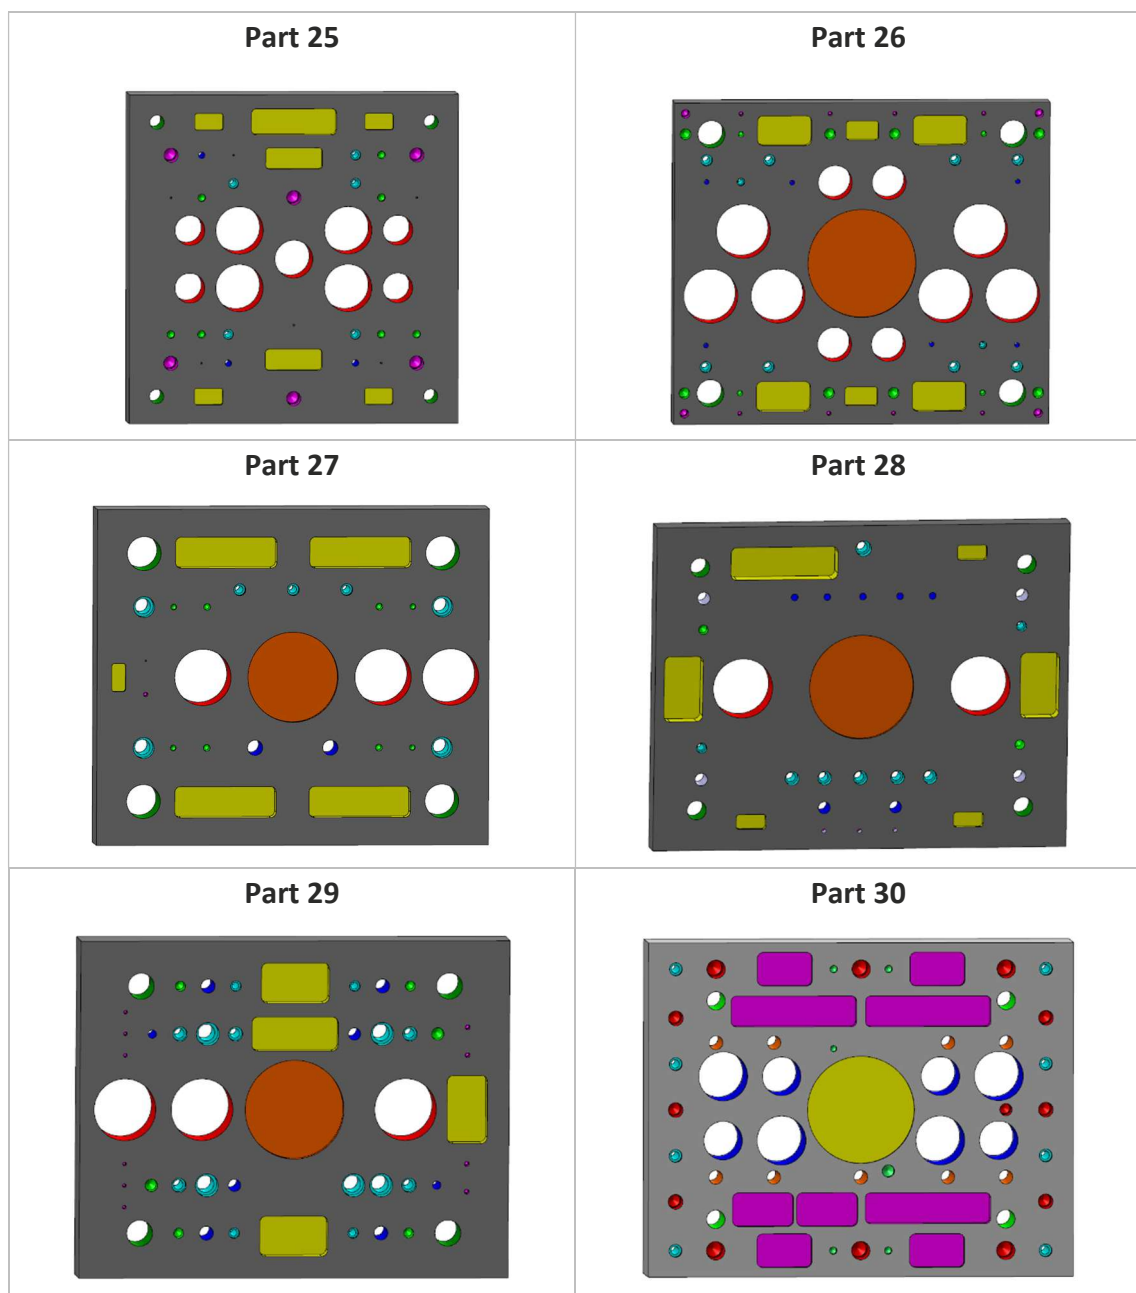

**Figure S1.** List of produced parts.
